# Supplementary material for: Free Sugar Consumption and Obesity in European Adolescents: The HELENA Study
Source: MDPI journal article supplement (doi:10.3390/nu12123747), 2020-12-05
Supplement: s1 [file s1]

**Table S1.** Mean daily intake in grams (and standard deviation) for free sugars consumers from various dietary sources, compared by gender using the student-t test.

| Food Groups                                              | Boys     |              | Girls    |              | <i>p</i> -Value  |
|----------------------------------------------------------|----------|--------------|----------|--------------|------------------|
|                                                          | <i>n</i> | Mean (SD)    | <i>n</i> | Mean (SD)    |                  |
| Free sugars intake from cakes, pies, biscuits (g)        | 252      | 15.40 (6.70) | 248      | 12.59 (4.90) | <b>&lt;0.001</b> |
| Free sugars intake from breakfast cereals (g)            | 148      | 16.59 (7.24) | 134      | 12.66 (5.25) | <b>&lt;0.001</b> |
| Free sugars intake from carbonated and soft drinks (g)*  | 320      | 16.88 (7.18) | 260      | 13.80 (5.23) | <b>&lt;0.001</b> |
| Free sugars intake from chocolates (g)                   | 274      | 16.96 (7.26) | 266      | 13.19 (5.04) | <b>&lt;0.001</b> |
| Free sugars intake from confectionary non chocolates (g) | 136      | 18.16 (7.59) | 174      | 14.11 (5.12) | <b>&lt;0.001</b> |
| Free sugars intake from desserts and puddings (g)**      | 75       | 17.55 (6.85) | 108      | 13.12 (5.33) | <b>0.006</b>     |
| Free sugars intake from fruits and vegetables juices (g) | 283      | 16.39 (6.99) | 285      | 13.12 (4.74) | <b>&lt;0.001</b> |
| Free sugars intake from other sources (g)                | 435      | 15.49 (7.05) | 408      | 12.56 (4.99) | <b>&lt;0.001</b> |
| Free sugars intake from sugars, honey, and jams (g)      | 153      | 16.73 (7.34) | 123      | 14.16 (5.38) | <b>0.001</b>     |

*n*: number of consumers. SD: standard deviation. Boldface values indicate significance, *p*-value < 0.05. \* includes isotonic drinks, non-alcoholic wine, and beer; \*\* includes ice cream.

**Table S2.** Frequency of consumption of food groups containing free sugars consumed as snack, according to BMI categories and sex.

| Food Groups           | Categories               | Normal Weight |        | Overweight |        | Obesity |        | p-Value |       |       |       |
|-----------------------|--------------------------|---------------|--------|------------|--------|---------|--------|---------|-------|-------|-------|
|                       |                          | n (%)         |        | n (%)      |        | n (%)   |        |         |       |       |       |
|                       |                          | Boys          | Girls  | Boys       | Girls  | Boys    | Girls  | Boys    | Girls | Total |       |
| Dried fruit           | Never                    | 56.70%        | 64.50% | 53.30%     | 74.30% | 76.50%  | 80.00% | 0.2     | 0.544 | 0.324 |       |
|                       | Sometimes                | 37.70%        | 32.10% | 33.30%     | 25.70% | 23.50%  | 20.00% |         |       |       |       |
|                       | Often                    | 5.60%         | 3.30%  | 13.30%     | 0.00%  | 0.00%   | 0.00%  |         |       |       |       |
|                       | Yoghurt/ yoghurt product | Never         | 17.50% | 13.80%     | 33.30% | 16.70%  | 17.60% | 10.00%  | 0.292 | 0.96  | 0.457 |
|                       |                          | Sometimes     | 43.90% | 45.60%     | 30.00% | 44.40%  | 41.20% | 40.00%  |       |       |       |
|                       |                          | Often         | 38.60% | 40.60%     | 36.70% | 38.90%  | 41.20% | 0.00%   |       |       |       |
| Sweet and candy       | Never                    | 12.50%        | 10.20% | 6.50%      | 13.90% | 11.80%  | 20.00% | 0.241   | 0.501 | 0.29  |       |
|                       | Sometimes                | 57.90%        | 56.90% | 77.40%     | 63.90% | 70.60%  | 40.00% |         |       |       |       |
|                       | Often                    | 29.60%        | 32.90% | 16.10%     | 22.20% | 17.60%  | 40.00% |         |       |       |       |
| Chocolate             | Never                    | 14.50%        | 10.20% | 23.30%     | 13.90% | 23.50%  | 10.00% | 0.263   | 0.961 | 0.344 |       |
|                       | Sometimes                | 51.30%        | 54.10% | 56.70%     | 52.80% | 58.80%  | 60.00% |         |       |       |       |
|                       | Often                    | 34.20%        | 35.60% | 20.00%     | 33.30% | 17.60%  | 30.00% |         |       |       |       |
| Biscuit and cookies   | Never                    | 13.10%        | 7.00%  | 19.40%     | 11.10% | 11.80%  | 10.00% | 0.63    | 0.185 | 0.304 |       |
|                       | Sometimes                | 55.90%        | 56.00% | 51.60%     | 72.20% | 70.60%  | 50.00% |         |       |       |       |
|                       | Often                    | 31.00%        | 36.90% | 29.00%     | 16.70% | 17.60%  | 40.00% |         |       |       |       |
| Cakes/ muffins        | Never                    | 20.30%        | 18.90% | 25.80%     | 8.80%  | 35.30%  | 20.00% | 0.341   | 0.517 | 0.527 |       |
|                       | Sometimes                | 62.70%        | 65.00% | 51.60%     | 79.40% | 41.20%  | 60.00% |         |       |       |       |
|                       | Often                    | 17.00%        | 16.20% | 22.60%     | 11.80% | 23.5    | 20.00% |         |       |       |       |
| Bowel of cereals      | Never                    | 29.80%        | 26.80% | 32.30%     | 34.30% | 17.60%  | 40.00% | 0.833   | 0.074 | 0.441 |       |
|                       | Sometimes                | 37.70%        | 37.60% | 38.70%     | 45.70% | 41.20%  | 60.00% |         |       |       |       |
|                       | Often                    | 32.50%        | 35.60% | 29.00%     | 20.00% | 41.20%  | 0.00%  |         |       |       |       |
| Cereals bar           | Never                    | 49.70%        | 46.10% | 34.50%     | 51.40% | 58.80%  | 33.30% | 0.444   | 0.908 | 0.924 |       |
|                       | Sometimes                | 37.40%        | 43.80% | 51.70%     | 40.00% | 35.30%  | 55.60% |         |       |       |       |
|                       | Often                    | 12.90%        | 10.10% | 13.80%     | 8.60%  | 5.90%   | 11.10% |         |       |       |       |
| Milk                  | Never                    | 12.70%        | 20.10% | 13.80%     | 20.60% | 17.60%  | 20.00% | 0.319   | 0.494 | 0.249 |       |
|                       | Sometimes                | 30.40%        | 28.20% | 41.40%     | 41.20% | 11.80%  | 40.00% |         |       |       |       |
|                       | Often                    | 56.90%        | 51.70% | 44.80%     | 38.20% | 70.60%  | 40.00% |         |       |       |       |
| Chocolate milk        | Never                    | 15.10%        | 19.10% | 13.80%     | 8.30%  | 17.60%  | 30.00% | 0.711   | 0.306 | 0.377 |       |
|                       | Sometimes                | 46.10%        | 46.90% | 41.40%     | 61.10% | 58.80%  | 50.00% |         |       |       |       |
|                       | Often                    | 38.80%        | 34.00% | 44.80%     | 30.60% | 23.50%  | 20.00% |         |       |       |       |
| Carbonated soft drink | Never                    | 9.40%         | 10.90% | 13.30%     | 5.60%  | 17.60%  | 10.00% | 0.149   | 0.693 | 0.629 |       |
|                       | Sometimes                | 42.50%        | 54.10% | 46.70%     | 61.10% | 64.70%  | 40.00% |         |       |       |       |
|                       | Often                    | 48.10%        | 35.00% | 40.00%     | 33.30% | 17.60%  | 50.00% |         |       |       |       |
| Juices                | Never                    | 4.30%         | 5.00%  | 6.70%      | 0.00%  | 23.50%  | 0.00%  | 0.013   | 0.579 | 0.173 |       |
|                       | Sometimes                | 39.70%        | 37.30% | 46.70%     | 33.30% | 29.40%  | 40.00% |         |       |       |       |
|                       | Often                    | 56.10%        | 57.80% | 46.70%     | 66.70% | 47.10%  | 60.00% |         |       |       |       |

Boldface values indicate significance, *p*-value < 0.05.
